# Supplementary material for: Conjugate Aurora Observations by the Gjøa and Discovery Expeditions
Source: Copernicus journal article supplement (doi:10.5194/hgss-2023-14), 2024-01-15
Supplement: Supplementary file [file hgss-2023-14-AC1-supplement.pdf]

Ref. no 3

I thank Ref. 3 for valuable and positive comments. Her follow my answerers and comments to his comments:

1) Meaning of the received results in relation to modern space physics should be described more clearly. Answer: The manuscript has been updated on this point, and regarding the language.

2) English in paper (style, first of all) is unsatisfactory. Answer: Doing the work with a new check of the paper I certainly hope my English has been improved, but I am not an expert.

4) It is recommended changing the paper title as follows: "Conjugate Aurora Observations in Greenland ??? and Antarctic by Amundsen's Expedition through the Northwest Passage and Scott's Discovery Expedition". Answer: This 'Title' is very long.

Will consult editor. Will not change. The title include the important words rg. This paper

5) The paper is recommended to publication with regard to these remarks. "Thank you"
