# Supplementary material for: Conjugate Aurora Observations by the Gjøa and Discovery Expeditions
Source: Copernicus journal article supplement (doi:10.5194/hgss-2023-14), 2024-01-15
Supplement: Supplementary file [file hgss-2023-14-AC2-supplement.pdf]

Remarks to referee 2

. I wish to thank Ref. 2 for positive comments, and recommendation for publication.

1) Form has been corrected.

2) The lines 42-50 has been reduced and rewritten.

3) Auroral fire spelled correct.

4) The reference to Signernes et al., 2011 has been put into Reference list.

Thanks for ref commernts it is easy tounderstan
